# Supplementary material
Source: publisher site journal article supplement (https://www.dovepress.com/article/496924)
Supplement: Supplementary file 1 [file get_supplementary_file.php]

**Supplement Table 1: Bivariate and Multivariate Logistic Regression analysis of variables predicting good knowledge toward responsible self-medication among pharmacy students (n=428)**

| Characteristics | Frequency (%) | Good knowledge | | | | |
| --- | --- | --- | --- | --- | --- | --- |
| Frequency (%) | COR (95% CI) | P – value | AOR (95% CI), P-value | P – value |
| **Age in years** |  |  |  |  |  |  |
| ≤ 24 | 272 (63.55) | 240 (88.24) | 1.23 (0.69-2.21) | 0.484 | NA | NA |
| > 24 | 156 (36.45) | 134 (85.89) | Ref | Ref | NA | NA |
| **Gender** |  |  |  |  |  |  |
| Male | 252 (58.88) | 226 (89.68) | Ref | Ref | Ref | Ref |
| Female | 176 (41.12) | 148 (84.09) | 1.64 (0.93-2.92) | 0.089 | 1.40 (0.75-2.64) | 0.294 |
| **Pharmacy division** |  |  |  |  |  |  |
| Diploma in Pharmacy | 123 (28.74) | 105 (85.37) | 5.83 (0.77-44.09) | 0.087 | 1.49 (0.13-16.60) | 0.748 |
| Bachelor of Pharmacy | 301 (70.33) | 267 (88.70) | 7.85 (1.07-57.58) | 0.043 | 4.85 (0.47-50.67) | 0.187 |
| Master of Pharmacy | 4 (0.93) | 2 (50.00) | Ref | Ref | Ref | Ref |
| **University / Institute** |  |  |  |  |  |  |
| Kampala International University | 288 (67.29) | 267 (92.71) | 3.96 (1.88-8.34) | <0.001 | 2.76 (1.08-7.08) | 0.035 |
| Mbarara University of Science and Technology | 59 (13.79) | 45 (76.27) | Ref | Ref | Ref | Ref |
| Makerere University | 81 (18.92) | 62 (76.54) | 1.02 (0.46-2.24) | 0.970 | 0.44 (0.17-1.14) | 0.091 |
| **Location** |  |  |  |  |  |  |
| Rural | 70 (16.35) | 66 (94.28) | 2.86 (0.96-8.48) | 0.059 | 1.69 (0.52-5.55) | 0.385 |
| Semi-urban | 175 (40.89) | 152 (86.86) | 1.44 (0.63-2.08) | 0.660 | 0.78 (0.39-1.59) | 0.495 |
| Urban | 183 (42.76) | 156 (85.25) | Ref | Ref | Ref | Ref |
| **Marital status** |  |  |  |  |  |  |
| Single | 397 (92.76) | 345 (86.90) | Ref | Ref | NA | NA |
| Married | 31 (7.24) | 29 (93.55) | 2.19 (0.51-9.43) | 0.295 | NA | NA |
| **Accommodation** |  |  |  |  |  |  |
| Hostilities | 97 (22.66) | 79 (81.44) | 0.86 (0.37-2.01) | 0.729 | 0.77 (0.29-2.01) | 0.587 |
| Resident student | 61 (14.25) | 51 (83.61) | Ref | Ref | Ref | Ref |
| Reside in rental | 270 (63.08) | 244 (90.37) | 1.84 (0.84-4.05) | 0.130 | 0.79 (0.31-2.00) | 0.612 |
| **Parents profession** |  |  |  |  |  |  |
| Medical | 68 (15.89) | 46 (67.65) | 0.20 (0.11-0.38) | <0.001 | 0.28 (0.14-0.57) | <0.001 |
| Non-medical | 360 (84.11) | 328 (91.11) | Ref | Ref | Ref | Ref |
| **Medical illness** |  |  |  |  |  |  |
| Yes | 104 (24.30) | 80 (76.92) | Ref | Ref | Ref | Ref |
| No | 324 (75.70) | 294 (90.74) | 2.94 (1.63-5.31) | <0.001 | 1.78 (0.88-3.58) | 0.106 |

AOR=Adjusted Odds Ratio; COR=Crudes Odds Ratio; CI=Confidence Interval; Ref=Reference; NA=Not Applicable

**Supplement Table 2: Bivariate and Multivariate Logistic Regression analysis of variables predicting positive attitudes toward responsible self-medication among pharmacy students (n=428)**

| Characteristics | Frequency (%) | Positive attitude | | | | |
| --- | --- | --- | --- | --- | --- | --- |
| Frequency (%) | COR (95% CI) | P – value | AOR (95% CI), P-value | P – value |
| **Age in years** |  |  |  |  |  |  |
| ≤ 24 | 272 (63.55) | 263 (96.69) | 1.58 (0.60-4.18) | 0.357 | NA | NA |
| > 24 | 156 (36.45) | 148 (94.87) | Ref | Ref | NA | NA |
| **Gender** |  |  |  |  |  |  |
| Male | 252 (58.88) | 239 (94.84) | Ref | Ref | Ref | Ref |
| Female | 176 (41.12) | 172 (97.73) | 2.34 (0.75-7.30) | 0.143 | 2.34 (0.75-7.30) | 0.143 |
| **Pharmacy division** |  |  |  |  |  |  |
| Diploma in Pharmacy | 123 (28.74) | 121 (98.37) | 0.00 (0.00-NV) | 0.999 | NA | NA |
| Bachelor of Pharmacy | 301 (70.33) | 286 (95.01) | 0.00 (0.00-NV) | 0.999 | NA | NA |
| Master of Pharmacy | 4 (0.93) | 4 (100.0) | Ref | Ref | NA | NA |
| **University / Institute** |  |  |  |  |  |  |
| Kampala International University | 288 (67.29) | 276 (95.83) | 0.39 (0.05-3.11) | 0.379 | NA | NA |
| Mbarara University of Science and Technology | 59 (13.79) | 58 (98.31) | Ref | Ref | NA | NA |
| Makerere University | 81 (18.92) | 77 (95.06) | 0.33 (0.04-3.01) | 0.330 | NA | NA |
| **Location** |  |  |  |  |  |  |
| Rural | 70 (16.35) | 68 (97.14) | 1.97 (0.42-9.20) | 0.391 | NA | NA |
| Semi-urban | 175 (40.89) | 170 (97.14) | 1.97 (0.66-5.87) | 0.333 | NA | NA |
| Urban | 183 (42.76) | 173 (94.53) | Ref | Ref | NA | NA |
| **Marital status** |  |  |  |  |  |  |
| Single | 397 (92.76) | 380 (95.71) | Ref | Ref | NA | NA |
| Married | 31 (7.24) | 31 (100.0) | 0.00 (0.00-NV) | 0.998 | NA | NA |
| **Accommodation** |  |  |  |  |  |  |
| Hostilities | 97 (22.66) | 94 (96.91) | 0.52 (0.05-5.14) | 0.578 | NA | NA |
| Resident student | 61 (14.25) | 60 (98.36) | Ref | Ref | NA | NA |
| Reside in rental | 270 (63.08) | 257 (95.19) | 0.33 (0.04-2.57) | 0.289 | NA | NA |
| **Parents profession** |  |  |  |  |  |  |
| Medical | 68 (15.89) | 65 (95.59) | 0.88 (0.25-3.14) | 0.840 | NA | NA |
| Non-medical | 360 (84.11) | 346 (96.11) | Ref | Ref | NA | NA |
| **Medical illness** |  |  |  |  |  |  |
| Yes | 104 (24.30) | 100 (96.15) | Ref | Ref | NA | NA |
| No | 324 (75.70) | 311 (95.99) | 0.96 (0.31-3.00) | 0.940 | NA | NA |

AOR=Adjusted Odds Ratio; COR=Crudes Odds Ratio; CI=Confidence Interval; NV=No value; Ref=Reference; NA=Not Applicable

**Supplement Table 3: Bivariate and Multivariate Logistic Regression analysis of variables predicting rational practices toward responsible self-medication among pharmacy students (n=415)**

| Characteristics | Frequency (%) | Rational practice | | | | |
| --- | --- | --- | --- | --- | --- | --- |
| Frequency (%) | COR (95% CI) | P – value | AOR (95% CI), P-value | P – value |
| **Age in years** |  |  |  |  |  |  |
| ≤ 24 | 272 (63.55) | 76 (27.94) | 1.09 (0.69-1.69) | 0.711 | NA | NA |
| > 24 | 156 (36.45) | 41 (26.28) | Ref | Ref | NA | NA |
| **Gender** |  |  |  |  |  |  |
| Male | 252 (58.88) | 81 (32.14) | Ref | Ref | Ref | Ref |
| Female | 176 (41.12) | 36 (20.45) | 0.54 (0.35-0.85) | 0.008 | 0.55 (0.35-0.88) | 0.013 |
| **Pharmacy division** |  |  |  |  |  |  |
| Diploma in Pharmacy | 123 (28.74) | 42 (34.15) | 1.56 (0.16-15.42) | 0.706 | NA | NA |
| Bachelor of Pharmacy | 301 (70.33) | 74 (24.58) | 0.98 (0.10-9.54) | 0.985 | NA | NA |
| Master of Pharmacy | 4 (0.93) | 1 (25.00) | Ref | Ref | NA | NA |
| **University / Institute** |  |  |  |  |  |  |
| Kampala International University | 288 (67.29) | 90 (31.25) | 2.53 (1.19-5.36) | 0.016 | 2.19 (0.98-4.89) | 0.055 |
| Mbarara University of Science and Technology | 59 (13.79) | 9 (15.25) | Ref | Ref | Ref | Ref |
| Makerere University | 81 (18.92) | 18 (22.22) | 1.59 (0.66-3.84) | 0.305 | 1.12 (0.45-2.81) | 0.802 |
| **Location** |  |  |  |  |  |  |
| Rural | 70 (16.35) | 16 (22.86) | 0.62 (0.33-1.18) | 0.146 | 0.48 (0.24-0.96) | 0.037 |
| Semi-urban | 175 (40.89) | 42 (24.00) | 0.66 (0.42-1.06) | 0.084 | 0.54 (0.32-0.89) | 0.016 |
| Urban | 183 (42.76) | 59 (32.24) | Ref | Ref | Ref | Ref |
| **Marital status** |  |  |  |  |  |  |
| Single | 397 (92.76) | 112 (28.21) | Ref | Ref | Ref | Ref |
| Married | 31 (7.24) | 5 (16.13) | 0.49 (0.18-1.31) | 0.154 | 0.49 (0.18-1.33) | 0.159 |
| **Accommodation** |  |  |  |  |  |  |
| Hostilities | 97 (22.66) | 28 (28.87) | 1.05 (0.52-2.14) | 0.892 | NA | NA |
| Resident student | 61 (14.25) | 17 (27.87 | Ref | Ref | NA | NA |
| Reside in rental | 270 (63.08) | 72 (26.67 | 0.94 (0.51-1.75) | 0.848 | NA | NA |
| **Parents profession** |  |  |  |  |  |  |
| Medical | 68 (15.89) | 15 (22.06) | 0.72 (0.39-1.33) | 0.289 | NA | NA |
| Non-medical | 360 (84.11) | 102 (28.33) | Ref | Ref | NA | NA |
| **Medical illness** |  |  |  |  |  |  |
| Yes | 104 (24.30) | 15 (14.42) | Ref | Ref | Ref | Ref |
| No | 324 (75.70) | 102 (31.48) | 2.75 (1.50-4.94) | 0.001 | 2.20 (1.18-4.11) | 0.013 |

AOR=Adjusted Odds Ratio; COR=Crudes Odds Ratio; CI=Confidence Interval; Ref=Reference; NA=Not Applicable
